# Supplementary material for: Reference intervals and percentiles for soluble transferrin receptor and sTfR/log ferritin index in healthy children and adolescents
Source: publisher site journal article supplement (doi:10.1515/cclm-2024-0369), 2024-07-05

Supplementary Figure 3

The selection of the proposed age intervals of the sTfR and sTfR-F index percentile values is shown.

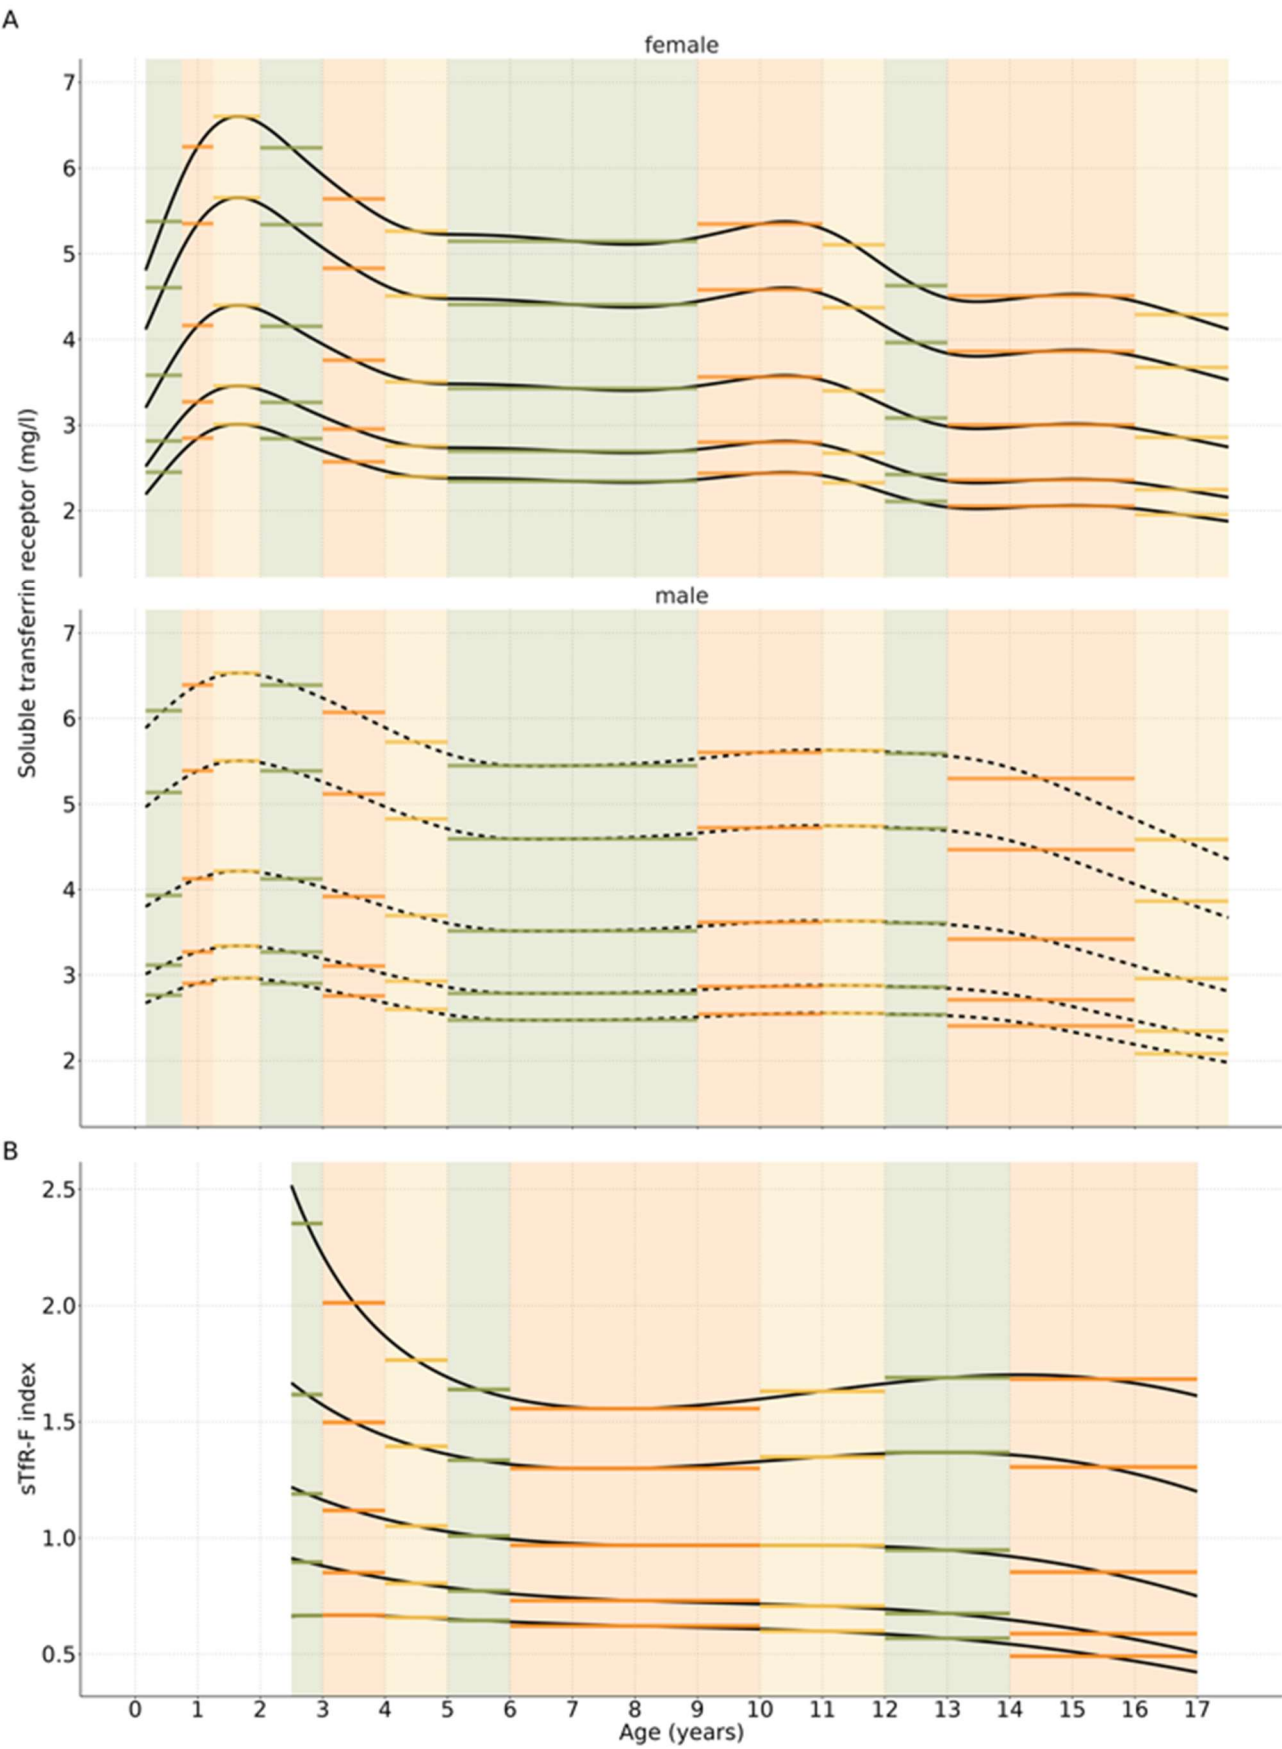

Supplement: Supplementary file 1 [file j_cclm-2024-0369_suppl_003.pdf]
