# Supplementary material for: Reference intervals and percentiles for soluble transferrin receptor and sTfR/log ferritin index in healthy children and adolescents
Source: publisher site journal article supplement (doi:10.1515/cclm-2024-0369), 2024-07-05
Supplement: Supplementary file 1 [file j_cclm-2024-0369_suppl_007.docx]

Supplementary Table 4

Proposed age intervals with assigned sTfR value (midpoint of the interval) of the 2.5th, 10th, 50th, 90th and 97.5th percentiles are shown as well as the age-specific distribution parameters for location (mu), spread (sigma), skewness (nu), and kurtosis.

| **Sex** | **Age range** | **sTfR percentile value** | | | | | | **Location** | | **Variation** | | **Skewness** | | **Kurtosis** |
| --- | --- | --- | --- | --- | --- | --- | --- | --- | --- | --- | --- | --- | --- | --- |
|  |  | **2.5th** | **10th** | **50th** | **90th** | **97.5th** | **mu** | | **sigma** | | **nu** | | **tau** | |
| male | ≤0.17 - 0.75 | 2.77 | 3.12 | 3.93 | 5.14 | 6.09 | 3.932 | | 0.196 | | -0.556 | | 1.806 | |
| male | 0.75 - 1.25 | 2.90 | 3.27 | 4.13 | 5.39 | 6.39 | 4.126 | | 0.196 | | -0.556 | | 1.806 | |
| male | 1.25 - 2.00 | 2.97 | 3.34 | 4.22 | 5.51 | 6.53 | 4.216 | | 0.196 | | -0.556 | | 1.806 | |
| male | 2.00 - 3.00 | 2.90 | 3.27 | 4.13 | 5.39 | 6.39 | 4.125 | | 0.196 | | -0.556 | | 1.806 | |
| male | 3.00 - 4.00 | 2.76 | 3.11 | 3.92 | 5.12 | 6.07 | 3.919 | | 0.196 | | -0.556 | | 1.806 | |
| male | 4.00 - 5.00 | 2.60 | 2.93 | 3.70 | 4.83 | 5.73 | 3.695 | | 0.196 | | -0.556 | | 1.806 | |
| male | 5.00 - 9.00 | 2.47 | 2.79 | 3.52 | 4.59 | 5.45 | 3.517 | | 0.196 | | -0.556 | | 1.806 | |
| male | 9.00 - 11.00 | 2.54 | 2.87 | 3.62 | 4.72 | 5.60 | 3.616 | | 0.196 | | -0.556 | | 1.806 | |
| male | 11.00 - 12.00 | 2.55 | 2.88 | 3.63 | 4.74 | 5.63 | 3.632 | | 0.196 | | -0.556 | | 1.806 | |
| male | 12.00 - 13.00 | 2.54 | 2.86 | 3.61 | 4.71 | 5.59 | 3.609 | | 0.196 | | -0.556 | | 1.806 | |
| male | 13.00 - 16.00 | 2.41 | 2.71 | 3.42 | 4.47 | 5.30 | 3.42 | | 0.196 | | -0.556 | | 1.806 | |
| male | 16:00 - 17.50 | 2.08 | 2.35 | 2.96 | 3.86 | 4.58 | 2.959 | | 0.196 | | -0.556 | | 1.806 | |
| female | ≤0.17 - 0.75 | 2.45 | 2.82 | 3.58 | 4.61 | 5.38 | 3.582 | | 0.196 | | -0.175 | | 1.675 | |
| female | 0.75 - 1.25 | 2.85 | 3.27 | 4.16 | 5.35 | 6.25 | 4.163 | | 0.196 | | -0.175 | | 1.675 | |
| female | 1.25 - 2.00 | 3.01 | 3.46 | 4.40 | 5.65 | 6.60 | 4.398 | | 0.196 | | -0.175 | | 1.675 | |
| female | 2.00 - 3.00 | 2.84 | 3.27 | 4.15 | 5.34 | 6.24 | 4.154 | | 0.196 | | -0.175 | | 1.675 | |
| female | 3.00 - 4.00 | 2.57 | 2.95 | 3.76 | 4.83 | 5.64 | 3.758 | | 0.196 | | -0.175 | | 1.675 | |
| female | 4.00 - 5.00 | 2.40 | 2.76 | 3.51 | 4.51 | 5.26 | 3.506 | | 0.196 | | -0.175 | | 1.675 | |
| female | 5.00 - 9.00 | 2.35 | 2.70 | 3.43 | 4.41 | 5.15 | 3.428 | | 0.196 | | -0.175 | | 1.675 | |
| female | 9.00 - 11.00 | 2.44 | 2.80 | 3.56 | 4.58 | 5.35 | 3.562 | | 0.196 | | -0.175 | | 1.675 | |
| female | 11.00 - 12.00 | 2.33 | 2.67 | 3.40 | 4.37 | 5.11 | 3.401 | | 0.196 | | -0.175 | | 1.675 | |
| female | 12.00 - 13.00 | 2.11 | 2.42 | 3.08 | 3.96 | 4.63 | 3.083 | | 0.196 | | -0.175 | | 1.675 | |
| female | 13.00 - 16.00 | 2.06 | 2.36 | 3.00 | 3.86 | 4.51 | 3.003 | | 0.196 | | -0.175 | | 1.675 | |
| female | 16:00 - 17.50 | 1.96 | 2.25 | 2.86 | 3.67 | 4.29 | 2.858 | | 0.196 | | -0.175 | | 1.675 | |
